# Supplementary material for: Near-infrared downshifting luminescence of Ca2LaTaO6:Nd3+/Yb3+/K+ phosphors and their applications: solar cells and anti-counterfeiting
Source: Royal Society of Chemistry journal article supplement (doi:10.1039/d4dt02748e), 2024-12-10
Supplement: d4dt02748e1.pdf [file d4dt02748e1.pdf]

## Near-infrared downshifting luminescence of $\text{Ca}_2\text{LaTaO}_6:\text{Nd}^{3+}/\text{Yb}^{3+}/\text{K}^+$

phosphor and their application: solar cell and anti-counterfeiting

School of electrical and computer engineering, Jilin jianzhu university, Changchun 130118, China

E-mail: [zhangyuhong@jlju.edu.cn](mailto:zhangyuhong@jlju.edu.cn)

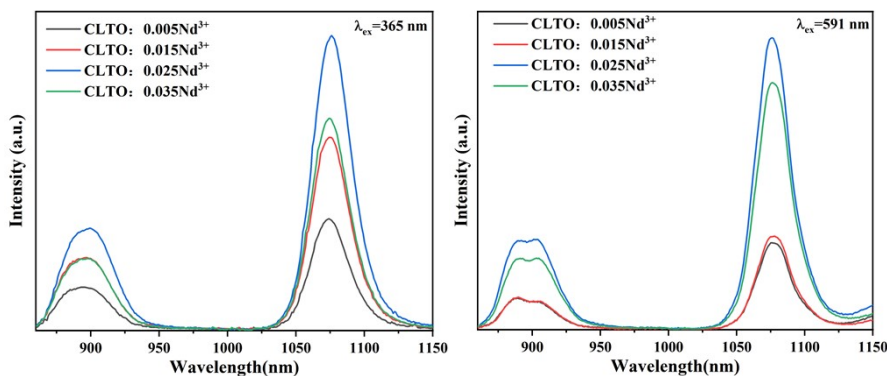

Fig.S1 PL spectra of CLTO: $x\text{Nd}^{3+}$  sample ( $x=0.005,0.015,0.025,0.035$ ) (a) under 365 nm excitation;(b) under 591 nm excitation.

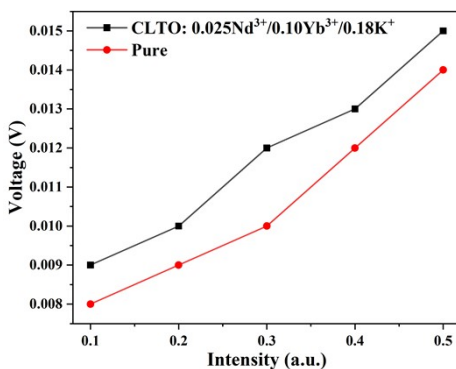

FS2. Optical-voltage curve of the solar panel with and without CLTO: $\text{Nd}^{3+}/\text{Yb}^{3+}/\text{K}^+$  phosphor
